# Supplementary material for: l-arginine, asymmetric and symmetric dimethylarginine for early outcome prediction in unselected cardiac arrest victims: a prospective cohort study
Source: PubMed Central journal article supplement (PMC8964544; doi:10.1007/s11739-021-02767-z), 2021-06-03
Supplement: 11739_2021_2767_MOESM1_ESM.pdf [file 11739_2021_2767_MOESM1_ESM.pdf]

## SUPPLEMENT MATERIAL

### **L-arginine, asymmetric and symmetric dimethylarginine for early outcome prediction in unselected cardiac arrest victims: a prospective cohort study.**

Journal name: **Internal and Emergency Medicine**

Beata Csiszar<sup>1,2</sup>, Zsolt Marton, Ph.D.<sup>1,2</sup>, Janos Riba<sup>1</sup>, Peter Csecsei, Ph.D.<sup>3</sup>, Lajos Nagy, Ph.D.<sup>4</sup>, Kalman Toth, D.Sc.<sup>1,2</sup>, Robert Halmosi, D.Sc.<sup>1,2</sup>, Barbara Sandor, Ph.D.<sup>1,2</sup>, Peter Kenyeres, Ph.D.<sup>\*1,2</sup>, Tihamer Molnar, Ph.D.<sup>5</sup>

<sup>1</sup>University of Pecs, Medical School, 1<sup>st</sup> Department of Medicine, Division of Cardiology, Pecs, Hungary

<sup>2</sup>University of Pecs, Szentagothai Research Centre, Pecs, Hungary

<sup>3</sup>University of Pecs, Medical School, Department of Neurosurgery, Pecs, Hungary

<sup>4</sup>University of Debrecen, Department of Applied Chemistry, Debrecen, Hungary

<sup>5</sup>University of Pecs, Medical School, Department of Anaesthesiology and Intensive Therapy, Pecs, Hungary

**\*Author for correspondence:**

Peter Kenyeres, MD, Ph.D.

University of Pecs, Medical School, 1<sup>st</sup> Department of Medicine, Division of Cardiology

7624 Pecs, 13 Ifjusag Street, Hungary

Phone: +3672/536-000 – 32638

Fax: +3672/536-148

ORCID: <https://orcid.org/0000-0002-9074-2280>

E-Mail: [kenyeres.peter@pte.hu](mailto:kenyeres.peter@pte.hu)

**Table 1. - L-arginine pathway molecules and their change according to the ICU mortality**

|                                                        | Survivors (n=21; 39%) | Non-survivors (n=33; 61%) | p value      |
|--------------------------------------------------------|-----------------------|---------------------------|--------------|
| <b>Biomarker plasma levels within 6 hours after CA</b> |                       |                           |              |
| L-arginin (μmol/L)                                     | 33.17 [29.43 – 52.68] | 42.25 [23.59 – 49.96]     | N.S.         |
| ADMA (μmol/L)                                          | 0.58 [0.46 – 0.66]    | 0.70 [0.46 – 0.89]        | N.S.         |
| SDMA (μmol/L)                                          | 0.77 [0.62 – 1.73]    | 0.96 [0.81 – 1.46]        | N.S.         |
| <b>Biomarker plasma levels 24 hours after CA</b>       |                       |                           |              |
| L-arginin (μmol/L)                                     | 48.82 [31.04 – 69.06] | 38.14 [23.24 – 56.77]     | N.S.         |
| ADMA (μmol/L)                                          | 0.59 [0.51 – 0.79]    | 0.54 [0.41 – 0.81]        | N.S.         |
| SDMA (μmol/L)                                          | 0.97 [0.74 – 2.79]    | 1.30 [0.85 – 1.81]        | N.S.         |
| <b>Biomarker plasma levels 72 hours after CA</b>       |                       |                           |              |
| L-arginin (μmol/L)                                     | 61.01 [47.35 – 77.33] | 53.78 [35.98 – 75.31]     | N.S.         |
| ADMA (μmol/L)                                          | 0.60 [0.50 – 0.76]    | 0.62 [0.45 – 0.85]        | N.S.         |
| SDMA (μmol/L)                                          | 0.90 [0.67 – 2.20]    | 1.48 [0.92 – 1.75]        | N.S.         |
| <b>ΔL-arginin (24h-6h) (μmol/L)</b>                    |                       |                           |              |
| ΔL-arginin (24h-6h) (μmol/L)                           | 10.81 [-2.78 – 25.16] | 2.84 [-17.13 – 13.24]     | N.S.         |
| ΔADMA (24h-6h) (μmol/L)                                | 0.07 [-0.04 – 0.11]   | -0.08 [-0.16 – 0.05]      | <b>0.024</b> |
| ΔSDMA (24h-6h) (μmol/L)                                | 0.21 [0.003 – 0.46]   | 0.11 [-0.01 – 0.39]       | N.S.         |
| <b>ΔL-arginin (72h-24h) (μmol/L)</b>                   |                       |                           |              |
| ΔL-arginin (72h-24h) (μmol/L)                          | 18.98 [-6.31 – 29.75] | 8.95 [-9.21 – 28.66]      | N.S.         |
| ΔADMA (72h-24h) (μmol/L)                               | 0.01 [-0.06 – 0.14]   | 0.07 [-0.06 – 0.14]       | N.S.         |
| ΔSDMA (72h-24h) (μmol/L)                               | -0.06 [-0.37 – 0.06]  | 0.16 [-0.23 – 0.55]       | N.S.         |

Data are presented as median values with interquartile range [percentiles 25–75]. ADMA: asymmetric dimethylarginine; CA: cardiac arrest; SDMA: symmetric dimethylarginine.

**Table 2. – L-arginine pathway molecules and their change according to the 30-day mortality**

|                                                        | Survivors<br>(n=16;<br>29.63%) | Non-survivors<br>(n=38;<br>70.37%) | p value      |
|--------------------------------------------------------|--------------------------------|------------------------------------|--------------|
| <b>Biomarker plasma levels within 6 hours after CA</b> |                                |                                    |              |
| L-arginin (μmol/L)                                     | 33.31 [29.24 – 51.86]          | 41.67 [25.01 – 51.68]              | N.S.         |
| ADMA (μmol/L)                                          | 0.54 [0.46 – 0.64]             | 0.67 [0.44 – 0.89]                 | N.S.         |
| SDMA (μmol/L)                                          | 0.77 [0.62 – 1.96]             | 0.95 [0.76 – 1.43]                 | N.S.         |
| <b>Biomarker plasma levels 24 hours after CA</b>       |                                |                                    |              |
| L-arginin (μmol/L)                                     | 42.97 [28.61 – 69.06]          | 39.09 [31.26 – 57.75]              | N.S.         |
| ADMA (μmol/L)                                          | 0.59 [0.51 – 0.77]             | 0.54 [0.44 – 0.83]                 | N.S.         |
| SDMA (μmol/L)                                          | 0.89 [0.7138 – 3.06]           | 1.18 [0.89 – 1.81]                 | N.S.         |
| <b>Biomarker plasma levels 72 hours after CA</b>       |                                |                                    |              |
| L-arginin (μmol/L)                                     | 62.32 [54.14 – 74.25]          | 49.26 [36.01 – 78.26]              | N.S.         |
| ADMA (μmol/L)                                          | 0.59 [0.51 – 0.79]             | 0.65 [0.45 – 0.84]                 | N.S.         |
| SDMA (μmol/L)                                          | 1.22 [0.72 – 2.34]             | 1.32 [0.74 – 1.71]                 | N.S.         |
| <b>Change in biomarker plasma levels</b>               |                                |                                    |              |
| ΔL-arginin (24h-6h) (μmol/L)                           | 10.81 [-2.48 – 26.59]          | 2.84 [-10.41 – 17.60]              | N.S.         |
| ΔADMA (24h-6h) (μmol/L)                                | 0.07 [-0.03 – 0.11]            | -0.08 [-0.16 – 0.06]               | <b>0.028</b> |
| ΔSDMA (24h-6h) (μmol/L)                                | 0.17 [0.003 – 0.56]            | 0.14 [-0.01 – 0.41]                | N.S.         |
| ΔL-arginin (72h-24h) (μmol/L)                          | 19.16 [4.96 – 34.88]           | 8.62 [-7.60 – 27.12]               | N.S.         |
| ΔADMA (72h-24h) (μmol/L)                               | 0.04 [-0.05 – 0.16]            | 0.06 [-0.07 – 0.13]                | N.S.         |
| ΔSDMA (72h-24h) (μmol/L)                               | -0.06 [-0.32 – 0.13]           | 0.08 [-0.32 – 0.47]                | N.S.         |

Data are presented as median values with interquartile range [percentiles 25–75]. ADMA: asymmetric dimethylarginine; CA: cardiac arrest; SDMA: symmetric dimethylarginine.

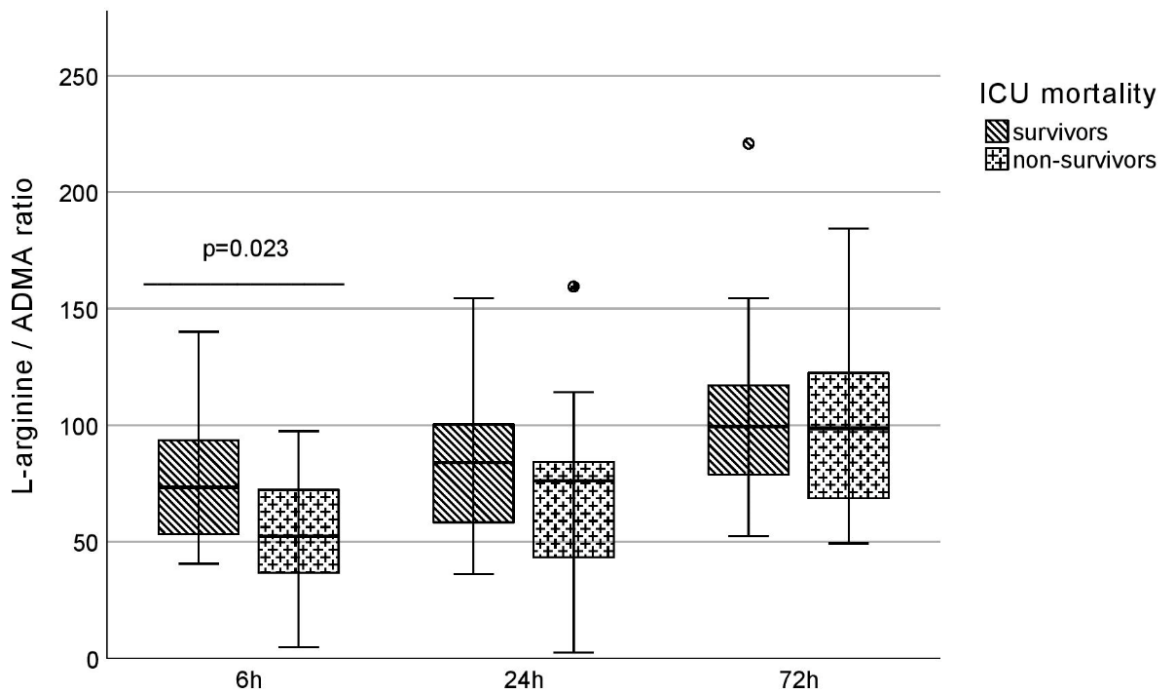

**Figure 1.** L-arginine/ADMA ratio and ICU mortality in IHCA group

(ADMA: asymmetric dimethylarginine; ICU: intensive care unit; IHCA: in-hospital cardiac arrest)

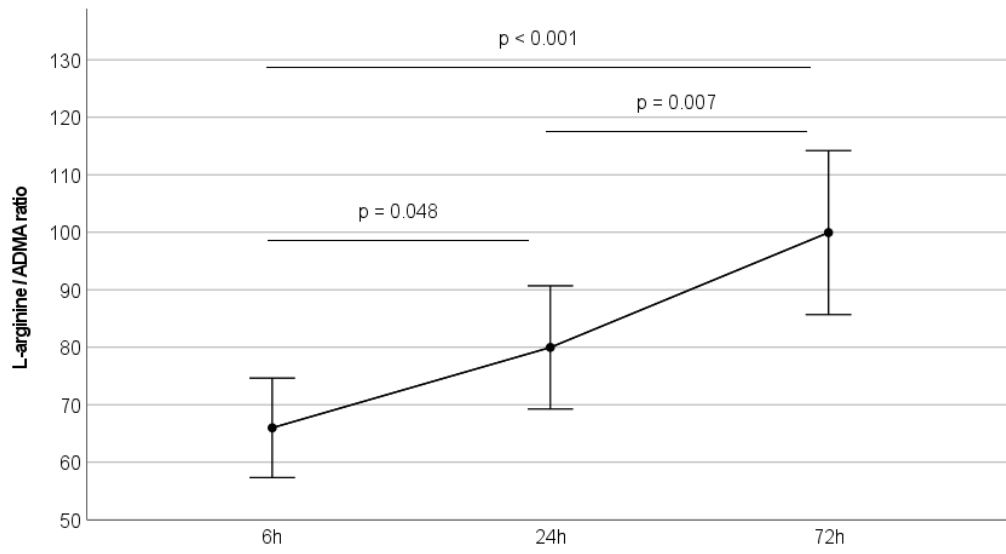

**Figure 2.** The kinetics of the L-arginine/ADMA ratio in the total population  
(ADMA: asymmetric dimethylarginine)

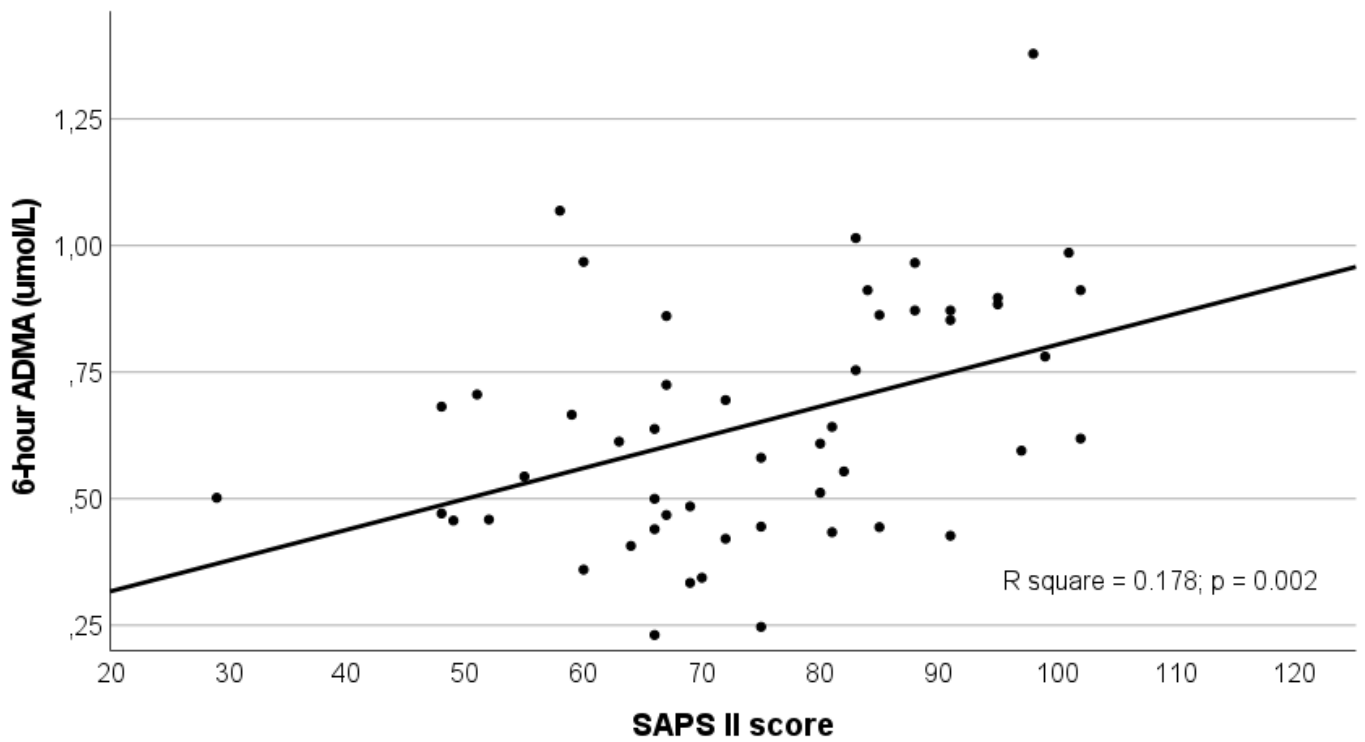

**Figure 3.** – Correlation between 6-hour ADMA levels and SAPS II score  
(ADMA: asymmetric dimethylarginine, SAPS: simplified acute physiology score)
